# Supplementary material for: Anomaly Detection in Biological Early Warning Systems Using Unsupervised Machine Learning
Source: MDPI journal article supplement (doi:10.3390/s23052687), 2023-03-01
Supplement: s1 [file s1]

# Anomaly detection in biological early warning systems using unsupervised machine learning

Aleksandr N. Grekov <sup>1,2</sup>, Aleksey A. Kabanov <sup>2,\*</sup>, Elena V. Vyshkvarkova <sup>1</sup>,  
Valeriy V. Trusevich <sup>1</sup>

<sup>1</sup> Institute of Natural and Technical Systems, Sevastopol 299011, Russia

<sup>2</sup> Department of Informatics and Control in Technical Systems, Sevastopol State  
University, Sevastopol 299053, Russia

\* Correspondence: kabanovaleksey@gmail.com

Table S1 – Example of raw data (valves opening value in mm)

| date_time              | M1        | M2   | M3   | M4   | M5   | M6   | M7   | M8   | M9   | M10  | M11  | M12  | M13  | M14  | M15  | M16  |
|------------------------|-----------|------|------|------|------|------|------|------|------|------|------|------|------|------|------|------|
| 2017-02-26<br>00:00:00 | -6,8      | 7    | 4,43 | 6,85 | 5,5  | 7,45 | 2,96 | 1,25 | 3,91 | 8,92 | 4,43 | 4,07 | 4,28 | 3,95 | 7,09 | 7,65 |
| 2017-02-26<br>00:00:10 | -6,8      | 7    | 4,44 | 6,85 | 5,48 | 7,45 | 2,96 | 1,25 | 3,91 | 8,92 | 4,44 | 4,06 | 4,28 | 3,95 | 7,09 | 7,65 |
| 2017-02-26<br>00:00:20 | -6,8      | 7    | 4,43 | 6,85 | 5,49 | 7,45 | 2,96 | 1,25 | 3,91 | 8,92 | 4,43 | 4,07 | 4,28 | 3,95 | 7,09 | 7,67 |
| 2017-02-26<br>00:00:30 | -<br>6,81 | 6,99 | 4,43 | 6,86 | 5,5  | 7,45 | 2,96 | 1,25 | 3,91 | 8,92 | 4,44 | 4,07 | 4,29 | 3,95 | 7,09 | 7,64 |
| 2017-02-26<br>00:00:40 | -6,8      | 7    | 4,44 | 6,85 | 5,49 | 7,46 | 2,96 | 1,25 | 3,91 | 8,92 | 4,43 | 4,07 | 4,29 | 3,95 | 7,09 | 7,66 |
| 2017-02-26<br>00:00:50 | -6,8      | 7    | 4,43 | 6,85 | 5,49 | 7,45 | 2,96 | 1,25 | 3,91 | 8,92 | 4,44 | 4,07 | 4,27 | 3,95 | 7,1  | 7,66 |
| 2017-02-26<br>00:01:00 | -6,8      | 7    | 4,44 | 6,85 | 5,48 | 7,45 | 2,96 | 1,25 | 3,9  | 8,92 | 4,43 | 4,07 | 4,28 | 3,95 | 7,09 | 7,66 |
| 2017-02-26<br>00:01:10 | -<br>6,81 | 7    | 4,44 | 6,86 | 5,48 | 7,45 | 2,96 | 1,25 | 3,91 | 8,93 | 4,44 | 4,07 | 4,28 | 3,95 | 7,09 | 7,66 |

## Confusion matrices

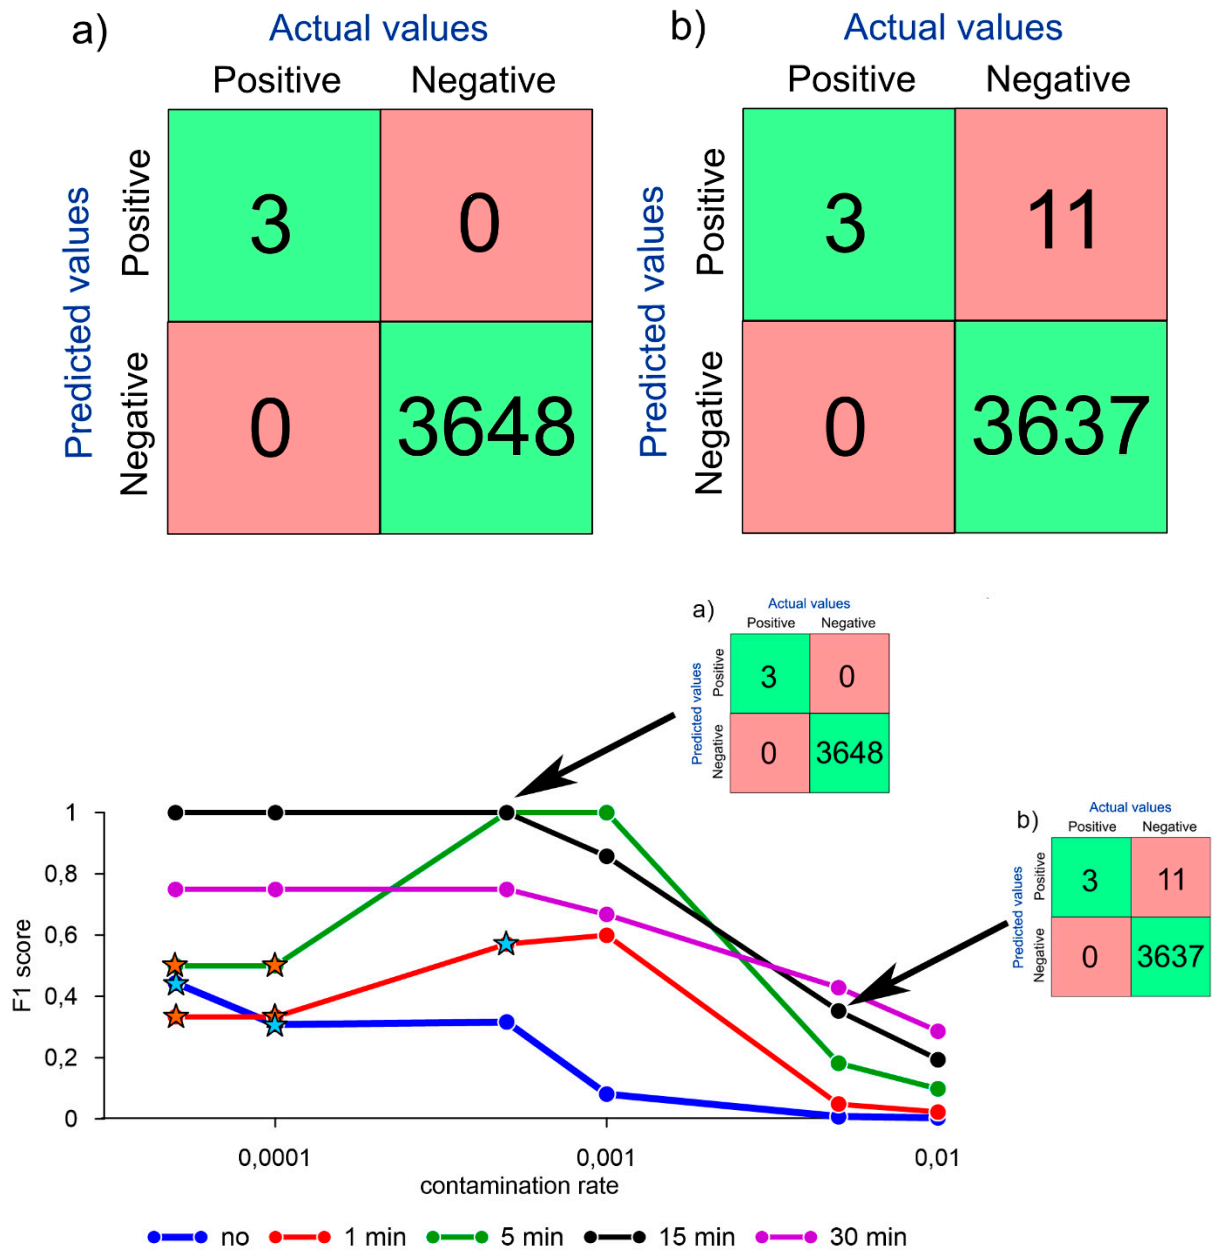

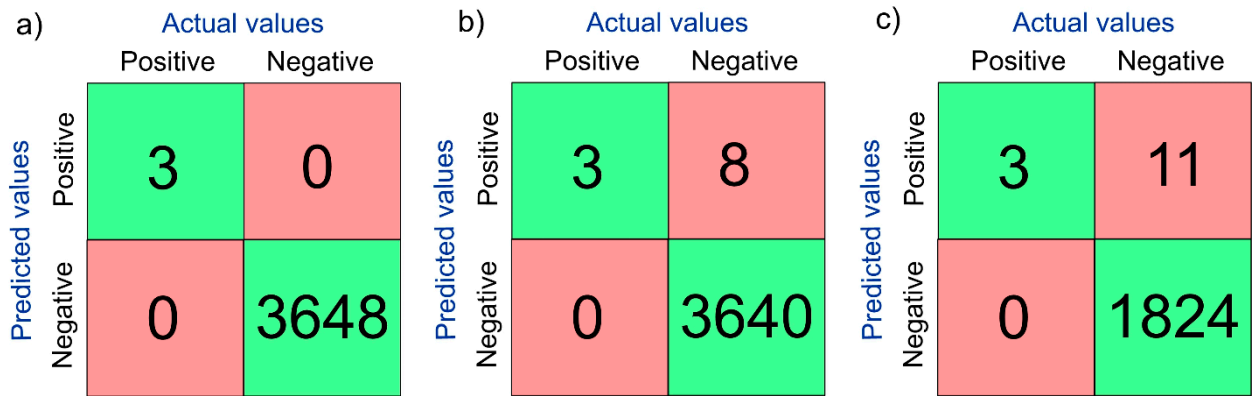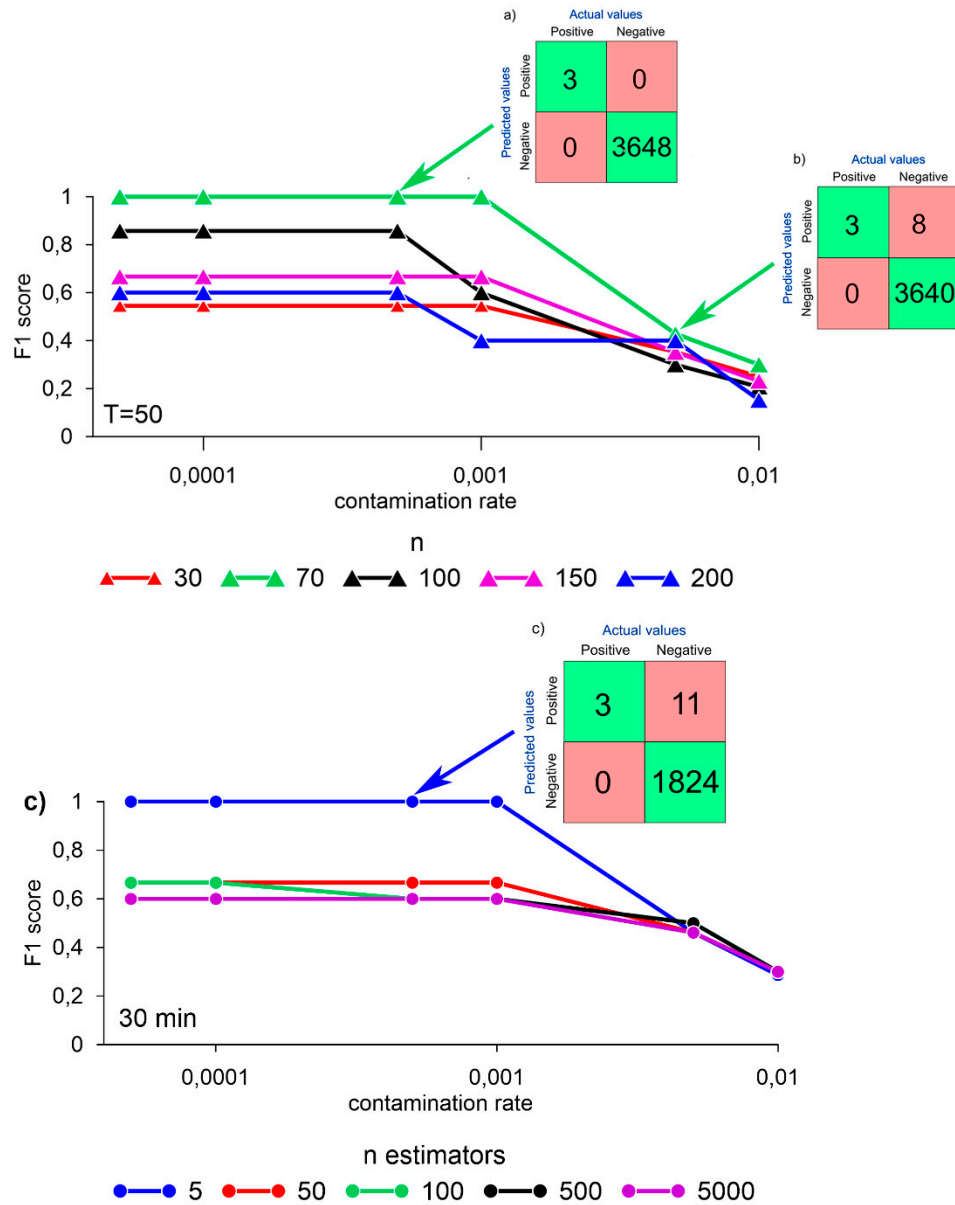

Figure S2. Confusion matrices for iForest algorithm models:  
 (a) 15 min average time, cr = 0.0005, max\_samples = 70, n=50, F1 score = 1;  
 (b) 15 min average time, cr = 0.005, max\_samples = 70, n=50, F1 score = 0.429;  
 (c) 30 min average time, cr = 0.0005, max\_samples = 256, n=5, F1 score = 1

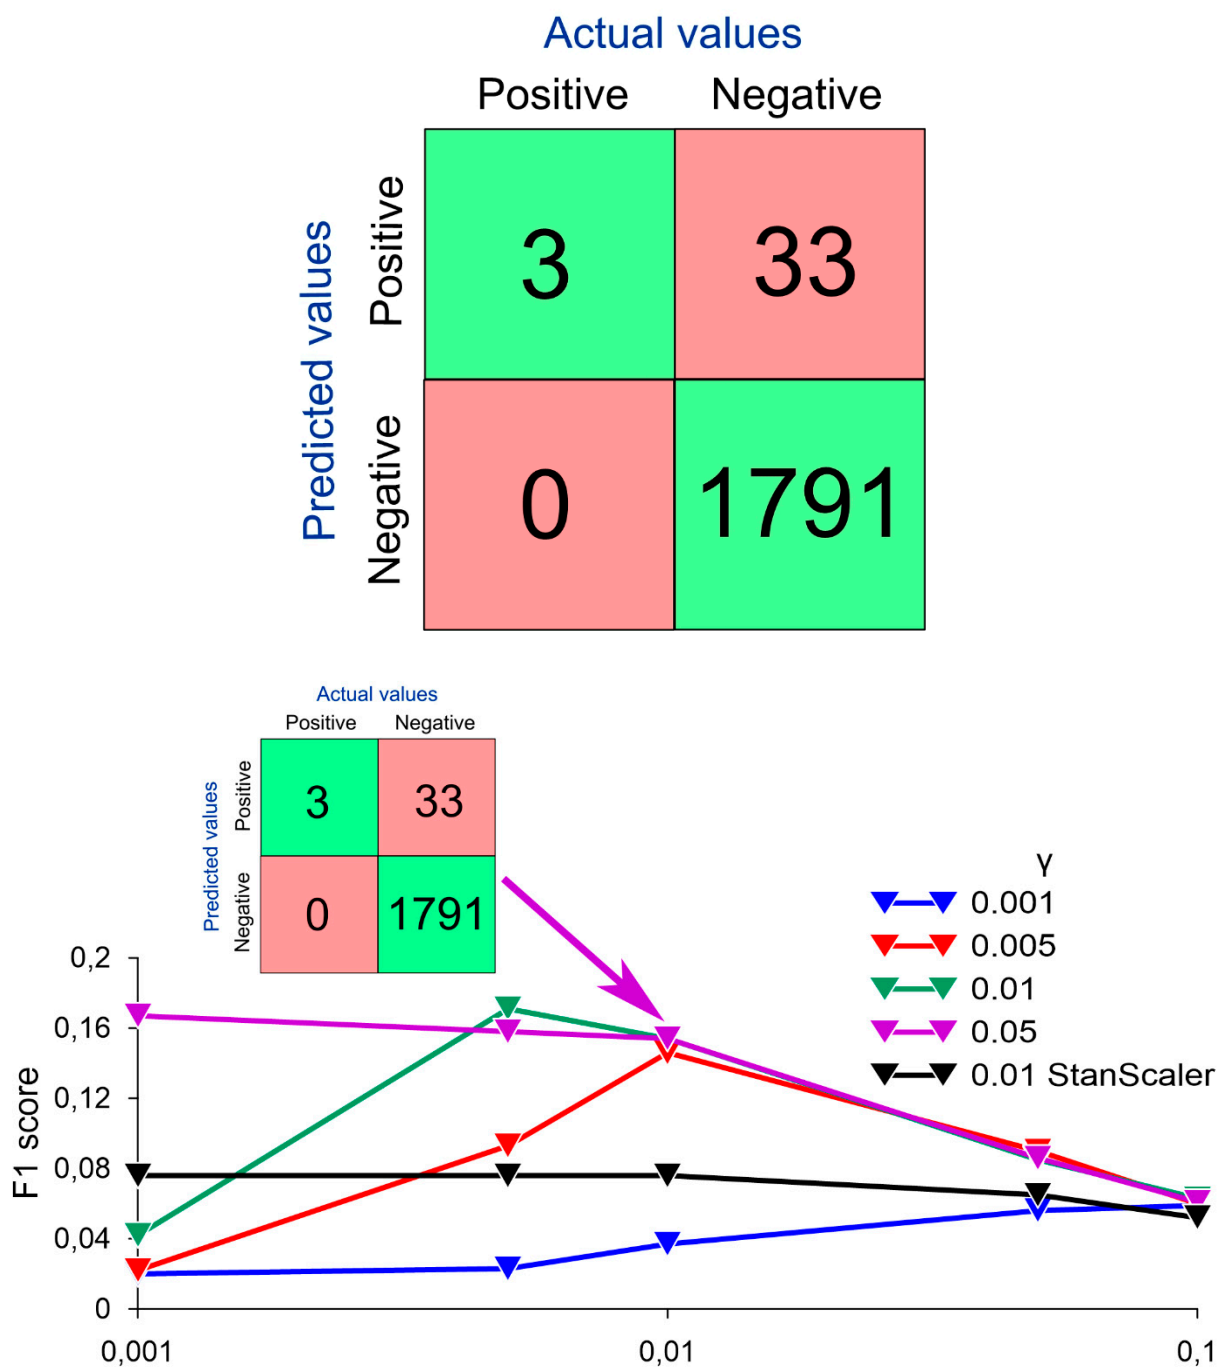

Figure S3. Confusion matrix for One-Class SVM algorithm model: 30 min average time, RBF, MinMaxScaler,  $cr = 0.01$ ,  $\gamma = 0.05$ , F1 score = 0,154;

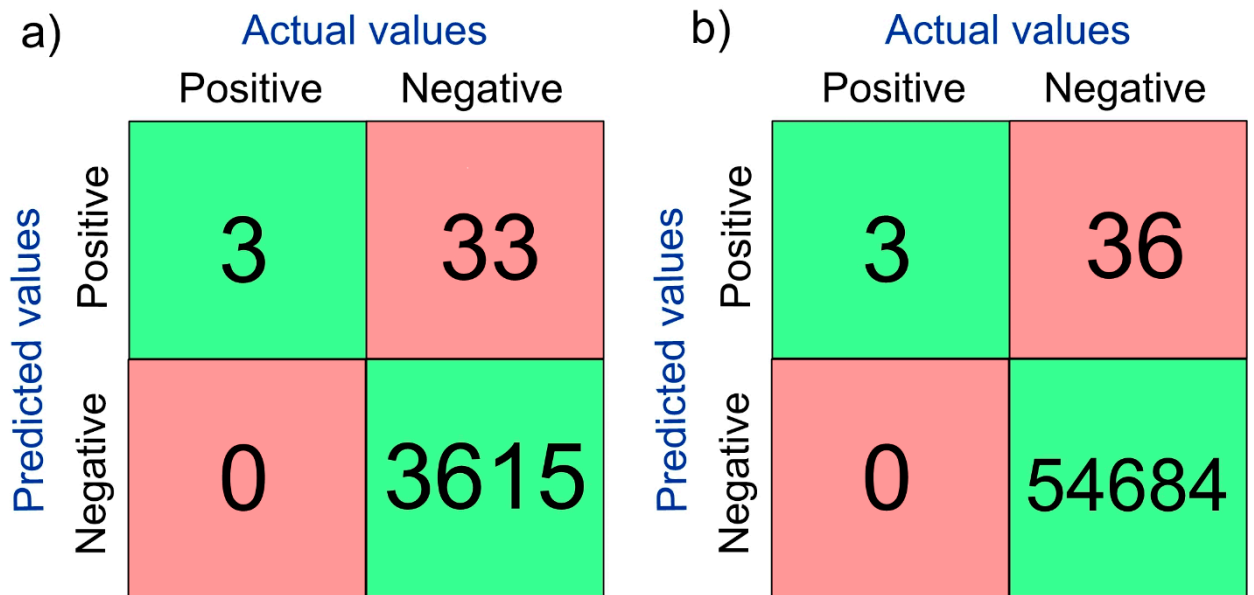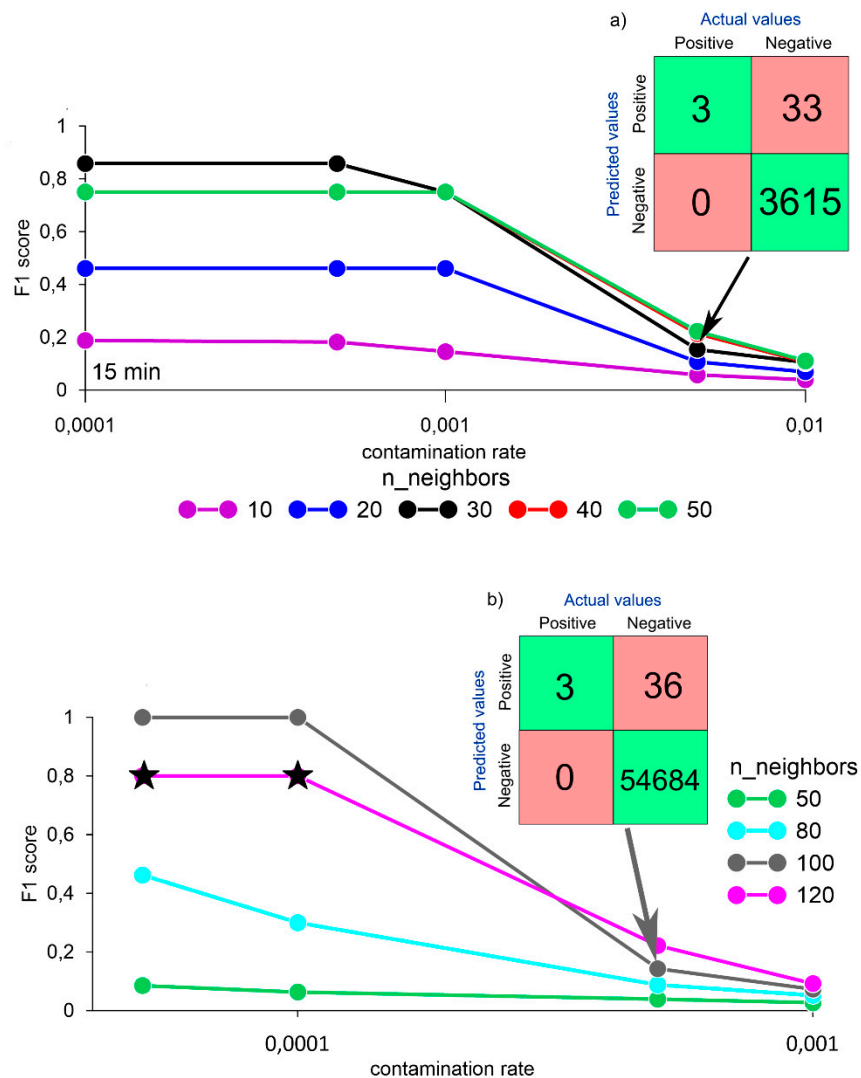

Figure S4. Confusion matrices for LOF algorithm models:  
 (a) 15 min average time, cr = 0.005, k-neighbors = 30, F1 score = 0.154;  
 (b) 1 min average time, cr = 0.0005, k-neighbors = 100, F1 score = 0.143;
